# Supplementary material for: Intermittent Hypoxia-Induced Cardiomyocyte Death Is Mediated by HIF-1 Dependent MAM Disruption
Source: MDPI journal article supplement (doi:10.3390/antiox11081462), 2022-07-27
Supplement: s1 [file s1]

Supplemental Figure S1. Mean data of main parameters: Age, Gender, Body-mass index, kind of cardiac surgery (CABG: Coronary Artery Bypass Grafting; VR: Valve Replacement), NT-Pro-BNP and Apnea Hypopnea Index characterizing control and sleep disordered breathing (SDB) patients enrolled in the study as previously described in *Moulin S et al. Can J Cardiol, 2020*

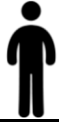

|                                                    | Control  | SDB      | P value  |
|----------------------------------------------------|----------|----------|----------|
| Number                                             | 10       | 10       |          |
| Age (year)                                         | 68±3     | 73±2     |          |
| Gender (M/F)                                       | 10/0     | 10/0     |          |
| Body-mass index (kg.m <sup>2</sup> )               | 28.4±0.8 | 29.9±1   |          |
| Cardiac surgery<br>(CABG/VR/CABG-VR)               | 9/0/1    | 8/1/1    |          |
| NT-Pro-BNP (ng/ml)                                 | 1400±978 | 1000±372 |          |
| Polysomnographic data<br>Apnea-hypopnea index (/h) | 4.6±0.6  | 22±2.2   | P<0.0001 |
